# Supplementary material
Source: MDPI journal article supplement (https://www.mdpi.com/2674-0311/2/1/1)
Supplement: s1 [file s1]

**Table S2. Daily consumption of food group among indigenous women of India.**

| Tribe       | N  |                         | Cereals<br>(g/day) | Pulses<br>(g/day) | GLVs<br>(g/day) | Roots<br>&<br>Tubers<br>(g/day) | Other<br>vegetables<br>(g/day) | Fruits<br>(g/day) | Meat &<br>Poultry<br>(g/day) | Fish and<br>other<br>seafoods<br>(g/day) | Milk &<br>milk<br>products<br>(g/day) | Visible<br>fats &<br>oils<br>(g/day) | Sugar<br>&<br>Jaggery<br>(g/day) | Dietary<br>assessment<br>method | Random<br>sample<br>(yes/no)<br>(g/day) |
|-------------|----|-------------------------|--------------------|-------------------|-----------------|---------------------------------|--------------------------------|-------------------|------------------------------|------------------------------------------|---------------------------------------|--------------------------------------|----------------------------------|---------------------------------|-----------------------------------------|
|             |    | 70%<br>RDI <sup>a</sup> | 300                | 90                | 150             | 100                             | 200                            | 150               |                              | 63                                       | 300                                   | 20                                   | -                                |                                 |                                         |
| Jharkhand   |    |                         |                    |                   |                 |                                 |                                |                   |                              |                                          |                                       |                                      |                                  |                                 |                                         |
| Munda [1]   |    | Median                  | 288.4              | 22.9              | 41.7            | 56.6                            | 52.1                           | 8.7               | 37.5                         |                                          | ND                                    | ND                                   | ND                               | 1                               | Yes                                     |
|             |    | IQR                     | 218.3-<br>375      | 12.4-<br>41.7     | 25.8-<br>63.8   | 31.2-<br>98.3                   | 26.1-93.8                      | 3.1-<br>23.3      | 22.5-72.8                    |                                          |                                       |                                      |                                  |                                 |                                         |
| Meghalaya   |    |                         |                    |                   |                 |                                 |                                |                   |                              |                                          |                                       |                                      |                                  |                                 |                                         |
| Khasi [2]   | 47 | Mean                    | 419.3              | 14.1              | 24.5            | 95.6                            | 49.6                           | 3.1               | 51.6                         | 18.7                                     | 9.5                                   | 6.8                                  | 20.7                             | 1                               | Yes                                     |
|             |    | SD                      | 121.6              | 31                | 48.9            | 68.3                            | 71.9                           | 11.9              | 58.4                         | 55                                       | 29.2                                  | 8.1                                  | 8.7                              |                                 |                                         |
| Rajasthan   |    |                         |                    |                   |                 |                                 |                                |                   |                              |                                          |                                       |                                      |                                  |                                 |                                         |
| Saharia [3] | 93 | Mean                    | 275.2              | 27.9              | 34.9            | 43.5                            | 16.7                           | 9.8               | -                            | -                                        | 97.1                                  | 12.8                                 | 9.0                              | 1                               | No                                      |
|             |    | SD                      | 59.3               | 24.8              | 45.2            | 31.4                            | 29.6                           | 23.8              | -                            | -                                        | 44.7                                  | 5.2                                  | 4.9                              |                                 |                                         |
| Meena [3]   | 92 | Mean                    | 276.6              | 20.2              | 38              | 32.6                            | 39.4                           | 12.2              | -                            | -                                        | 171.2                                 | 16                                   | 10.9                             | 1                               | No                                      |
|             |    | SD                      | 54.6               | 22.3              | 50.2            | 43.9                            | 50.3                           | 25.8              | -                            | -                                        | 93.5                                  | 10.2                                 | 7.2                              |                                 |                                         |
| Tamil Nadu  |    |                         |                    |                   |                 |                                 |                                |                   |                              |                                          |                                       |                                      |                                  |                                 |                                         |
| Irula [4]   | 30 | Mean                    | 276                | 61                | 5               | 91                              | 26                             | 91                | -                            | -                                        | 112                                   | 30                                   | 10                               | 2                               | No                                      |
| Irular [5]  | 60 | Mean                    | 195                | 33                | 42              | -                               | 145                            | 36                | -                            | -                                        | 124                                   | 20                                   | -                                | 1                               | No                                      |

GLVs, Green leafy vegetables, RDI, Recommended dietary intake, ND, No Data. a- [6]. 1-24-hour recall method.

## References

1. Ghosh-Jerath, S.; Kapoor, R.; Bandhu, A.; Singh, A.; Downs, S.; Fanzo, J. Indigenous Foods to Address Malnutrition: An Inquiry into the Diets and Nutritional Status of Women in the Indigenous Community of Munda Tribes of Jharkhand, India. *Current Developments in Nutrition* **2022**, *6*, nzac102, doi:10.1093/cdn/nzac102.
2. Chyne, D.A.L.; Meshram, I.I.; Rajendran, A.; Kodali, V.; Getti, N.; Roy, P.; Kuhnlein, H.V.; Longvah, T. Nutritional Status, Food Insecurity, and Biodiversity among the Khasi in Meghalaya, North-East India. *Matern Child Nutr* **2017**, *13 Suppl 3*, doi:10.1111/mcn.12557.
3. Chishty, S.; Singh, N. Nutritional Status of Tribal Women (Saharia and Meena), Baran District of Rajasthan, India. *Nutrition & Food Science* **2018**, *48*, doi:10.1108/NFS-01-2018-0018.
4. Padmavathi, C.; Ramadas, V.S. Impact of Education Programme among the Irula Tribals at Neelampathy, Ramadas V S -. *Int J Food Nutr Sci* **2012**, *1*, 42–51.
5. Sujatha, P. Analysis of Nutrition and Reproductive Health Status of Tribal Women in Kancheepuram District. *International Journal of Research in Humanities, Arts and Science* **2017**, *2*, 95–101.
6. ICMR-NIN *Nutrient Requirements for Indians: A Report of the Expert Group, 2020*; ICMR-National Institute of Nutrition, Indian Council of Medical Research, Department of Health Research, Ministry of Health and Family Welfare, Government of India: Hyderabad, India, 2020.
