# Supplementary material
Source: MDPI journal article supplement (https://www.mdpi.com/2674-0311/2/1/1)
Supplement: s1 [file s1]

**Table S3. Dietary diversity scores in indigenous women of India.**

| <b>Indigenous community (state)</b> | <b>Mean MDD-W score</b>    |
|-------------------------------------|----------------------------|
| Sauria Paharia (Jharkhand)          | 3 (median)                 |
| Munda (Jharkhand)                   | 2.6 (monsoon); 3 (winters) |
| Khasi (Meghalaya)                   | 3.7                        |
| Garos (Meghalaya)                   | 4.8                        |
